# Supplementary material for: Bicyclic core estrogens as full antagonists: synthesis, biological evaluation and structure–activity relationships of estrogen receptor ligands based on bridged oxabicyclic core arylsulfonamides
Source: Royal Society of Chemistry journal article supplement (doi:10.1039/c2ob26531a), 2012-01-01
Supplement: c2ob26531a.pdf [file c2ob26531a.pdf]

## Supporting Information for

### Synthesis, biological evaluation and structure activity relationships of new estrogen receptor ligands based on a bridged oxabicyclic core embellished with arylsulfonamides

Manghong Zhu,<sup>a</sup> Chen Zhang,<sup>a</sup> Jerome C. Nwachukwu,<sup>c</sup> Sathish Srinivasan,<sup>c</sup> Valerie Cavett,<sup>c</sup>  
Yangfan Zheng,<sup>a</sup> Kathryn E. Carlson,<sup>b</sup> Chune Dong,<sup>a</sup> John A. Katzenellenbogen,<sup>b\*</sup> Kendall W.  
Nettles,<sup>c</sup> Hai-Bing Zhou<sup>a\*</sup>

#### TABLE OF CONTENTS

|                                                                                 |           |
|---------------------------------------------------------------------------------|-----------|
| <b>PART I. SYNTHETIC PROCEDURES AND CHARACTERIZATION OF COMPOUNDS 7- 9.....</b> | <b>S2</b> |
| <b>PART II. <sup>1</sup>H NMR ASSIGNMENTS OF <i>exo</i> 11.....</b>             | <b>S9</b> |

## PART I. SYNTHETIC PROCEDURES AND CHARACTERIZATION OF COMPOUNDS 7- 9 AND 11

**Materials and Methods.** Unless otherwise noted, reagents and materials were obtained from commercial suppliers and were used without further purification. Tetrahydrofuran and toluene were dried over Na and distilled prior to use. Dichloromethane was dried over CaH<sub>2</sub> and distilled prior to use. Glassware was oven-dried, assembled while hot, and cooled under an inert atmosphere. Unless otherwise noted, all reactions were conducted in an inert atmosphere. Reaction progress was monitored using analytical thin-layer chromatography (TLC). Visualization was achieved by UV light (254 nm). <sup>1</sup>H NMR and <sup>13</sup>C NMR spectra were obtained on Bruker Biospin AV400 (400 MHz) instrument. The chemical shifts are reported in ppm and are referenced to either tetramethylsilane or the solvent. Mass spectra were recorded under electron impact conditions at 70 eV. Melting points were obtained on SGW X-4 melting point apparatus and are uncorrected. Flash chromatography was performed with silica gel (0.040-0.063 mm) packing.

**General synthesis of dienophiles 7.** 2-Chloroethanesulfonyl chloride (1.2 equiv) was added slowly to a solution of aniline (0.5 equiv) in acetone at 0 °C. The mixture was stirred overnight at 0~10 °C, then evaporated *in vacuum*, extracted with CH<sub>2</sub>Cl<sub>2</sub> and water for 3 times. The combined organic layer was washed with saturated NaCl, dried over Na<sub>2</sub>SO<sub>4</sub>, filtered and evaporated *in vacuum*. The product was purified by column chromatography (EtOAc/ petroleum ether = 1:2).

**N-Phenylethenesulfonamide (7a).** White solid (34% yield; mp 123-125°C); <sup>1</sup>H NMR (400 MHz, CDCl<sub>3</sub>) δ 7.36 – 7.28 (m, 2H), 7.17 (dd, *J* = 16.6, 8.2 Hz, 3H), 7.01 (s, 1H), 6.57 (dd, *J* = 16.5, 9.9 Hz, 1H), 6.28 (d, *J* = 16.5 Hz, 1H), 5.95 (d, *J* = 9.9 Hz, 1H); MS (EI): *m/z* 183 (M<sup>+</sup>).

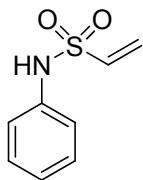

7a

**N-(4-methoxyphenyl)ethenesulfonamide (7b).** Colorless oil (30% yield); <sup>1</sup>H NMR (400 MHz, CDCl<sub>3</sub>) δ 7.18 (d, *J* = 8.8 Hz, 2H), 6.88 (d, *J* = 8.8 Hz, 2H), 6.52 (dd, *J* = 16.5, 9.9 Hz, 1H), 6.18 (d, *J* = 16.5 Hz, 1H), 5.99 (d, *J* = 9.9 Hz, 1H), 3.80 (s, 3H); MS (EI): *m/z* 213 (M<sup>+</sup>).

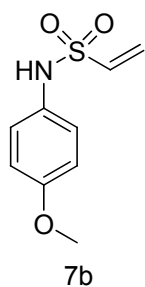

**N-(2-chlorophenyl)ethenesulfonamide (7c).** Light brown oil (35% yield);  $^1\text{H NMR}$  (400 MHz,  $\text{CDCl}_3$ )  $\delta$  7.59 (dd,  $J = 8.2, 1.3$  Hz, 1H), 7.39 (dd,  $J = 8.1, 1.3$  Hz, 1H), 7.28 – 7.25 (m, 1H), 7.11 (td,  $J = 7.8, 1.3$  Hz, 1H), 6.56 (dd,  $J = 16.5, 9.9$  Hz, 1H), 6.28 (d,  $J = 16.5$  Hz, 1H), 5.97 (d,  $J = 9.9$  Hz, 1H); MS (EI):  $m/z$  217 ( $\text{M}^+$ ).

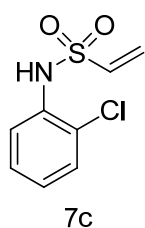

**N-(4-Chlorophenyl)ethenesulfonamide (7d).** Colorless oil (38% yield);  $^1\text{H NMR}$  (400 MHz,  $\text{CDCl}_3$ )  $\delta$  7.31 – 7.27 (m, 2H), 7.19 – 7.12 (m, 2H), 6.58 (dd,  $J = 16.5, 9.9$  Hz, 1H), 6.28 (d,  $J = 16.5$  Hz, 1H), 6.00 (d,  $J = 9.9$  Hz, 1H); MS (EI):  $m/z$  217 ( $\text{M}^+$ ).

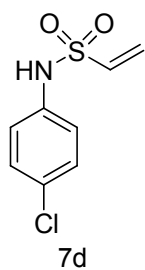

**General synthesis of dienophiles 8.** The corresponding anhydride (2.0 equiv) was added to a solution of aniline (1.0 equiv) and DMAP (0.2 equiv) in  $\text{CH}_2\text{Cl}_2$  (10 mL) at 0 °C. After the addition, the temperature was allowed to raise to room temperature. The reaction was quenched with water and stirred for 2h, extracted with  $\text{CH}_2\text{Cl}_2$  (3 × 30 mL). The combined organic layer was washed with 1N HCl, dried over  $\text{Na}_2\text{SO}_4$ , filtered and evaporated *in vacuo*. The crude amide **3** was used for next reaction without separation.

The  $\text{BH}_3$  (1 M in THF) (6.0 equiv) was added to a solution of amide **3** in THF under  $\text{Ar}_2$  atmosphere at room temperature. After the addition, the temperature was raised to 65 °C. The mixture was stirred for 4h, then cooled to the room temperature. The mixture was quenched with

MeOH at 0 °C, then evaporated *in vacuum*. The residue was dissolved into a mixture of Et<sub>2</sub>O and aq. NH<sub>4</sub>Cl and extracted with Et<sub>2</sub>O (3 × 30 mL). The combined organic phase was washed with saturated NaCl, dried over Na<sub>2</sub>SO<sub>4</sub>, filtered and evaporated *in vacuum*. The aniline **4** was purified by column chromatography (EtOAc/ petroleum ether = 1:10) to get colorless to light yellow oil.

2-Chloroethanesulfonyl chloride (1.2 equiv) and 25% NaOH (2.5 mL for 1mmol 2-chloroethanesulfonyl chloride) was added together slowly to a solution of aniline **4** (1.0 equiv) in CH<sub>2</sub>Cl<sub>2</sub> at 0 °C. The adding process should be very slow. After the addition, the temperature was allowed to raise to room temperature and stirred over night. The mixture was extracted with CH<sub>2</sub>Cl<sub>2</sub> (3 × 30 mL). The combined organic layers was washed with saturated NaCl, dried over Na<sub>2</sub>SO<sub>4</sub>, filtered and evaporated *in vacuum*. The product **8** was purified by column chromatography (EtOAc/ petroleum ether = 1:5).

**N-Ethyl-N-phenylethanesulfonamide (8a)**. Colorless oil (20% yield); <sup>1</sup>H NMR (400 MHz, CDCl<sub>3</sub>) δ 7.30 (t, *J* = 7.4 Hz, 2H), 7.27 – 7.18 (m, 3H), 6.46 (dd, *J* = 16.6, 9.9 Hz, 1H), 6.07 (d, *J* = 16.6 Hz, 1H), 5.87 (d, *J* = 9.9 Hz, 1H), 3.56 (q, *J* = 7.1 Hz, 2H), 1.04 (t, *J* = 7.1 Hz, 3H); MS (EI): *m/z* 211 (M<sup>+</sup>).

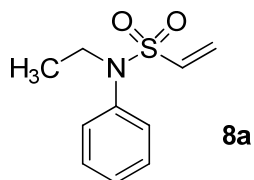

**N-Ethyl-N-(4-methoxyphenyl)ethanesulfonamide (8b)**. Colorless oil (20% yield); <sup>1</sup>H NMR (400 MHz, CDCl<sub>3</sub>) δ 7.23 – 7.16 (m, 2H), 6.92 – 6.86 (m, 2H), 6.54 (dd, *J* = 16.6, 9.9 Hz, 1H), 6.15 (d, *J* = 16.6 Hz, 1H), 5.94 (d, *J* = 9.9 Hz, 1H), 3.81 (s, 3H), 3.59 (q, *J* = 7.1 Hz, 2H), 1.12 (t, *J* = 7.1 Hz, 3H); MS (EI): *m/z* 241 (M<sup>+</sup>).

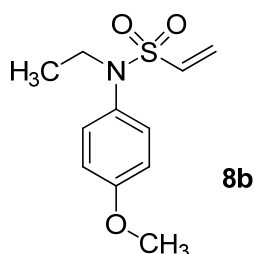

**N-(2-Chlorophenyl)-N-ethylethanesulfonamide (8c)**. Colorless oil (18% yield); <sup>1</sup>H NMR (400 MHz, CDCl<sub>3</sub>) δ 7.43 – 7.37 (m, 1H), 7.36 – 7.31 (m, 1H), 7.26 – 7.21 (m, 2H), 6.57 (dd, *J* = 16.5, 9.9 Hz, 1H), 6.14 (d, *J* = 16.5 Hz, 1H), 5.88 (d, *J* = 9.9 Hz, 1H), 3.56 (q, *J* = 7.2 Hz, 2H), 1.08 (t, *J* = 7.2

Hz, 3H); MS (EI):  $m/z$  245 ( $M^+$ ).

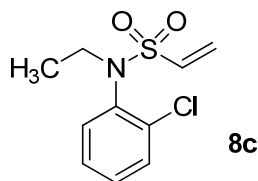

**N-(4-Chlorophenyl)-N-ethylethenesulfonamide (8d).** Colorless oil (17% yield);  $^1\text{H}$  NMR (400 MHz,  $\text{CDCl}_3$ )  $\delta$  7.27 (d,  $J = 8.5$  Hz, 2H), 7.15 (d,  $J = 8.6$  Hz, 2H), 6.44 (dd,  $J = 16.5, 9.9$  Hz, 1H), 6.07 (d,  $J = 16.5$  Hz, 1H), 5.90 (d,  $J = 9.9$  Hz, 1H), 3.55 (q,  $J = 7.1$  Hz, 2H), 1.04 (t,  $J = 7.1$  Hz, 3H); MS (EI):  $m/z$  245 ( $M^+$ ).

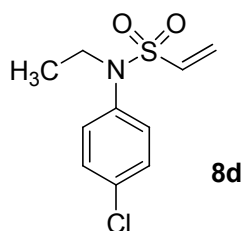

**N-Ethyl-N-(naphthalen-1-yl)ethenesulfonamide (8e).** Colorless oil (10% yield);  $^1\text{H}$  NMR (400 MHz,  $\text{CDCl}_3$ )  $\delta$  8.22 (d,  $J = 8.4$  Hz, 1H), 7.86 (d,  $J = 8.0$  Hz, 2H), 7.55 (dt,  $J = 24.2, 7.3$  Hz, 2H), 7.49 – 7.39 (m, 2H), 6.68 (dd,  $J = 16.6, 9.9$  Hz, 1H), 6.22 (d,  $J = 16.5$  Hz, 1H), 5.97 (d,  $J = 9.9$  Hz, 1H), 3.82 – 3.69 (q,  $J = 7.1$  Hz, 2H), 1.13 (t,  $J = 7.1$  Hz, 3H); MS (EI):  $m/z$  261 ( $M^+$ ).

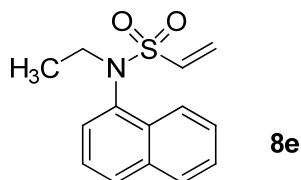

**N-Phenyl-N-(2,2,2-trifluoroethyl)ethenesulfonamide (8f).** Colorless oil (15% yield);  $^1\text{H}$  NMR (400 MHz,  $\text{CDCl}_3$ )  $\delta$  7.38 – 7.30 (m, 3H), 7.26 (dd,  $J = 7.8, 1.8$  Hz, 2H), 6.53 (dd,  $J = 16.5, 9.9$  Hz, 1H), 6.12 (d,  $J = 16.5$  Hz, 1H), 5.94 (d,  $J = 9.9$  Hz, 1H), 4.17 (q,  $J = 8.4$  Hz, 2H); MS (EI):  $m/z$  265 ( $M^+$ ).

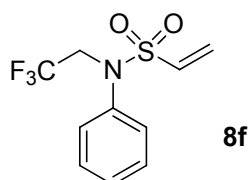

**N-(4-methoxyphenyl)-N-(2,2,2-trifluoroethyl)ethenesulfonamide (8g).** Colorless oil (18% yield);  $^1\text{H}$  NMR (400 MHz,  $\text{CDCl}_3$ )  $\delta$  7.16 (d,  $J = 8.9$  Hz, 2H), 6.81 (d,  $J = 9.0$  Hz, 2H), 6.50 (dd,  $J = 16.5, 9.9$  Hz, 1H), 6.06 (d,  $J = 16.5$  Hz, 1H), 5.90 (d,  $J = 9.9$  Hz, 1H), 4.09 (q,  $J = 8.4$  Hz, 2H), 3.71 (s,

3H); MS (EI):  $m/z$  295 ( $M^+$ ).

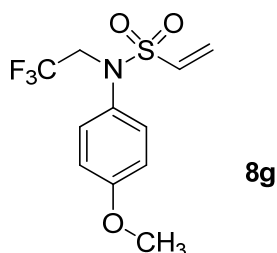

***N*-(4-Chlorophenyl)-*N*-(2,2,2-trifluoroethyl)ethenesulfonamide (8h).** Colorless oil (11% yield);  $^1\text{H}$  NMR (400 MHz,  $\text{CDCl}_3$ )  $\delta$  7.31 (d,  $J = 8.7$  Hz, 2H), 7.20 (d,  $J = 6.6$  Hz, 2H), 6.50 (dd,  $J = 16.5, 9.9$  Hz, 1H), 6.12 (d,  $J = 16.5$  Hz, 1H), 5.96 (d,  $J = 9.8$  Hz, 1H), 4.13 (q,  $J = 8.3$  Hz, 2H); MS (EI):  $m/z$  299 ( $M^+$ ).

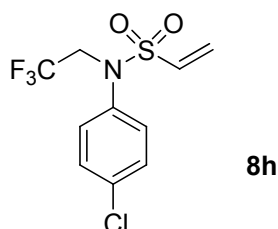

**General synthesis of dienophiles 9.** The acetic anhydride (2.0 equiv) was added to a solution of aniline (1.0 equiv) and DMAP (0.2 equiv) in  $\text{CH}_2\text{Cl}_2$  at 0 °C. After the addition, the temperature was allowed to raise to room temperature. The mixture was stirred for 2h, extracted with  $\text{CH}_2\text{Cl}_2$  (3  $\times$  30 mL). The combined organic layer was washed with 1N HCl, dried over  $\text{Na}_2\text{SO}_4$ , filtered and evaporated *in vacuo*. The crude amide **3** was used for next reaction without purification.

$\text{NaH}$  (1.2 equiv) was added to a solution of amide **3** in THF under  $\text{Ar}_2$  atmosphere at 0 °C. Keeping the temperature, the mixture stirred for 0.5h.  $\text{CH}_3\text{I}$  (1.2 equiv) was added dropwise, then the temperature was allowed to raise to room temperature. The mixture was stirred for 6h and quenched with aqueous  $\text{NH}_4\text{Cl}$  (25 mL) and extracted with EtOAc (3  $\times$  30 mL). The combined organic layer was washed with saturated NaCl, dried over  $\text{Na}_2\text{SO}_4$ , filtered and evaporated *in vacuo*. The crude product **5** was used for next reaction without separation.

The above obtained crude amide was refluxed in 10% HCl (0.25 mL for 1 mmol amide) and glycol (0.75 mL for 1 mmol amide) for 24h. The mixture was evaporated *in vacuo*, the residue was dissolved into a mixture of EtOAc (25 mL) and aqueous  $\text{NaHCO}_3$  (25 mL), then extracted with EtOAc (3  $\times$  30 mL). The combined organic layer was washed with saturated NaCl, dried over  $\text{Na}_2\text{SO}_4$ , filtered and evaporated in vacuum. The aniline **6** was purified by column chromatography (EtOAc/

petroleum ether = 1:6).

2-Chloroethanesulfonyl chloride (1.2 equiv) and 25% NaOH (2 mL for 1 mmol 2-chloroethanesulfonyl chloride) was added together slowly to a solution of aniline **6** (1.0 equiv) in CH<sub>2</sub>Cl<sub>2</sub> at 0 °C. The adding process should be very slow. After the addition, the temperature was allowed to raise to room temperature and stirred over night. The mixture was extracted with CH<sub>2</sub>Cl<sub>2</sub> (3 × 30 mL). The combined organic layer was washed with saturated NaCl, dried over Na<sub>2</sub>SO<sub>4</sub>, filtered and evaporated in vacuum. The product **9** was purified by column chromatography (EtOAc/petroleum ether = 1:5).

**N-Methyl-N-phenylethanesulfonamide (9a)**. Colorless oil (30% yield); <sup>1</sup>H NMR (400 MHz, CDCl<sub>3</sub>) δ 7.40 – 7.28 (m, 5H), 6.46 (dd, *J* = 16.6, 9.9 Hz, 1H), 6.19 (d, *J* = 16.6 Hz, 1H), 6.02 (d, *J* = 9.9 Hz, 1H), 3.24 (s, 3H); MS (EI): *m/z* 197 (M<sup>+</sup>).

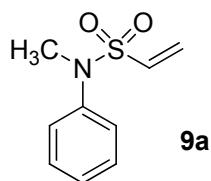

**N-(4-methoxyphenyl)-N-methylethanesulfonamide (9b)**. Brown oil (32% yield); <sup>1</sup>H NMR (400 MHz, CDCl<sub>3</sub>) δ 7.23 (d, *J* = 9.0 Hz, 2H), 6.87 (d, *J* = 8.9 Hz, 2H), 6.47 (dd, *J* = 16.6, 10.0 Hz, 1H), 6.17 (d, *J* = 16.6 Hz, 1H), 6.00 (d, *J* = 10.0 Hz, 1H), 3.80 (s, 3H), 3.20 (s, 3H); MS (EI): *m/z* 227 (M<sup>+</sup>).

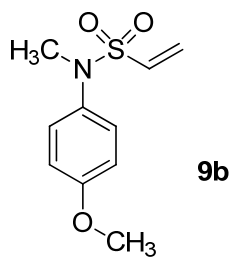

**N-(2-chlorophenyl)-N-methylethanesulfonamide (9c)**. Colorless oil (28% yield); <sup>1</sup>H NMR (400 MHz, CDCl<sub>3</sub>) δ 7.49 – 7.40 (m, 2H), 7.29 (dd, *J* = 6.0, 3.6 Hz, 2H), 6.63 (dd, *J* = 16.5, 9.9 Hz, 1H), 6.24 (d, *J* = 16.5 Hz, 1H), 6.00 (d, *J* = 9.9 Hz, 1H), 3.22 (s, 3H); MS (EI): *m/z* 231 (M<sup>+</sup>).

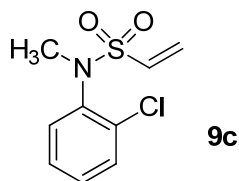

**N-(4-chlorophenyl)-N-methylethanesulfonamide (9d)**. Yellow oil (25% yield); <sup>1</sup>H NMR (400

MHz, CDCl<sub>3</sub>) δ 7.26 (d, *J* = 8.8 Hz, 2H), 7.19 (d, *J* = 3.4 Hz, 2H), 6.36 (dd, *J* = 16.6, 9.9 Hz, 1H), 6.12 (d, *J* = 16.6 Hz, 1H), 5.96 (d, *J* = 9.9 Hz, 1H), 3.15 (s, 3H); MS (EI): *m/z* 231 (M<sup>+</sup>).

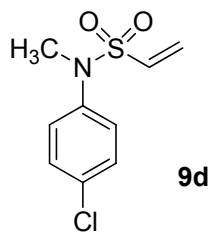



## PART II. $^1\text{H}$ NMR assignments of *exo* **11p**

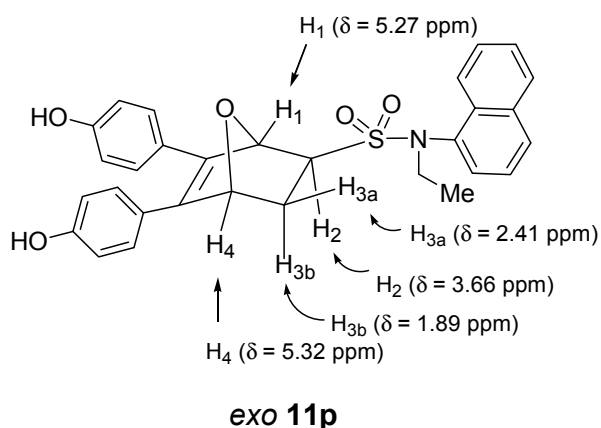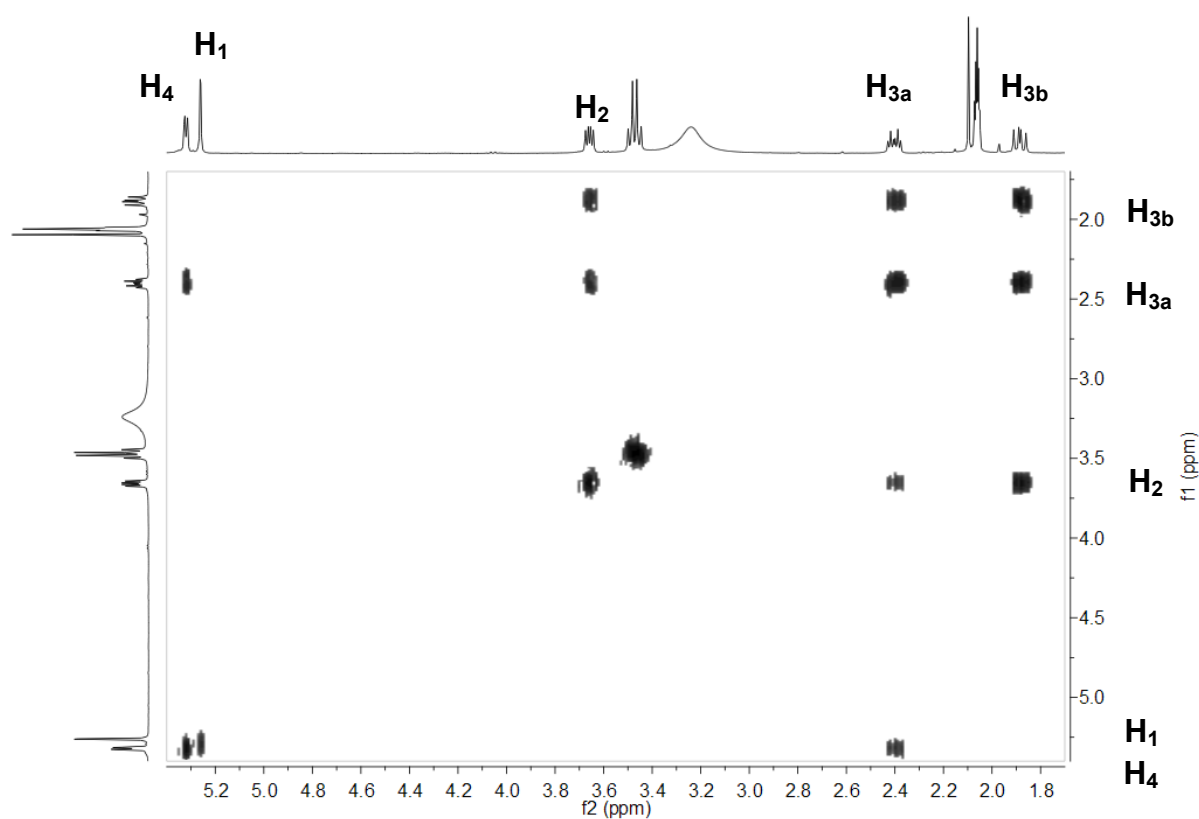

**Figure 1.** NOSY-NMR of *exo* **11p**. The peaks at 5.27 and 5.23 ppm are the hydrogen atoms on the bridgehead carbons (H<sub>1</sub> and H<sub>4</sub>), and the peak at 3.66 ppm is the hydrogen attached to the carbon bearing the sulfonate group (H<sub>2</sub>). It is evident that the H<sub>2</sub> doesn't interact with the bridgehead hydrogen. Since the bridgehead hydrogen is necessarily at an *exo* position, this interaction indicates that H<sub>2</sub> is at *endo* position, and, as a result, the sulfonate group is disposed in an *exo* configuration.
